# Supplementary material for: Aggressiveness Potential of Spontaneous Canine Mucosal Melanoma Can Dictate Distinct Cancer Stem Cell Compartment Behaviors in Regard to Their Initial Size and Expansion Abilities
Source: PubMed Central journal article supplement (PMC7374591; doi:10.1089/scd.2019.0223), 2020-07-09
Supplement: Supp_FigS1.pdf [file Supp_FigS1.pdf]

## Supplementary Data

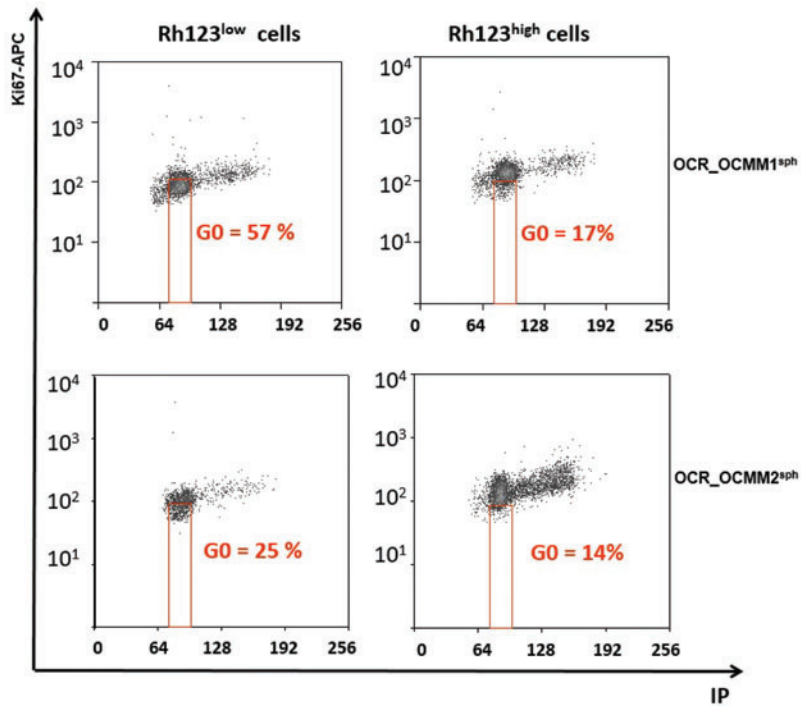

**SUPPLEMENTARY FIG. S1.** Rh123<sup>low</sup> cells from spheroids are enriched in quiescent G0 cells in both canine melanoma cell lines. Flow cytometry Ki67/PI assay with FACS-sorted Rh123<sup>low</sup> and Rh123<sup>high</sup> OCR\_OCMM1 and OCR\_OCMM2 spheroid cells (*red box* represents the percentage of G0 cells), showing the percentage of G0 cells. FACS, fluorescence-activated cell sorting; PI, propidium iodide; Rh123, rhodamine 123.
